# Supplementary material for: Ratiometric fluorescent determination of palladium based on the C–N bond cleavage of allyl quaternary ammonium
Source: Royal Society of Chemistry journal article supplement (doi:10.1039/d0nj06271e), 2021-01-01
Supplement: d0nj06271e1.pdf [file d0nj06271e1.pdf]

## New Journal of Chemistry-Supporting information

Ratiometric fluorescent determination of palladium based on the C-N bond cleavage  
of allyl quaternary ammonium

Zhize Ou, Liu He, Yunyan Gao\*, Pingyi Li, Tianzhu Li, Jing Zhang, Yitao Dong,  
Weijuan Zhou, Yiqing Zhang

Department of Chemistry, School of Chemistry and Chemical Engineering,  
Northwestern Polytechnical University, Xi'an 710072, People's Republic of China

\*Corresponding Author: gaoyunyan@nwpu.edu.cn

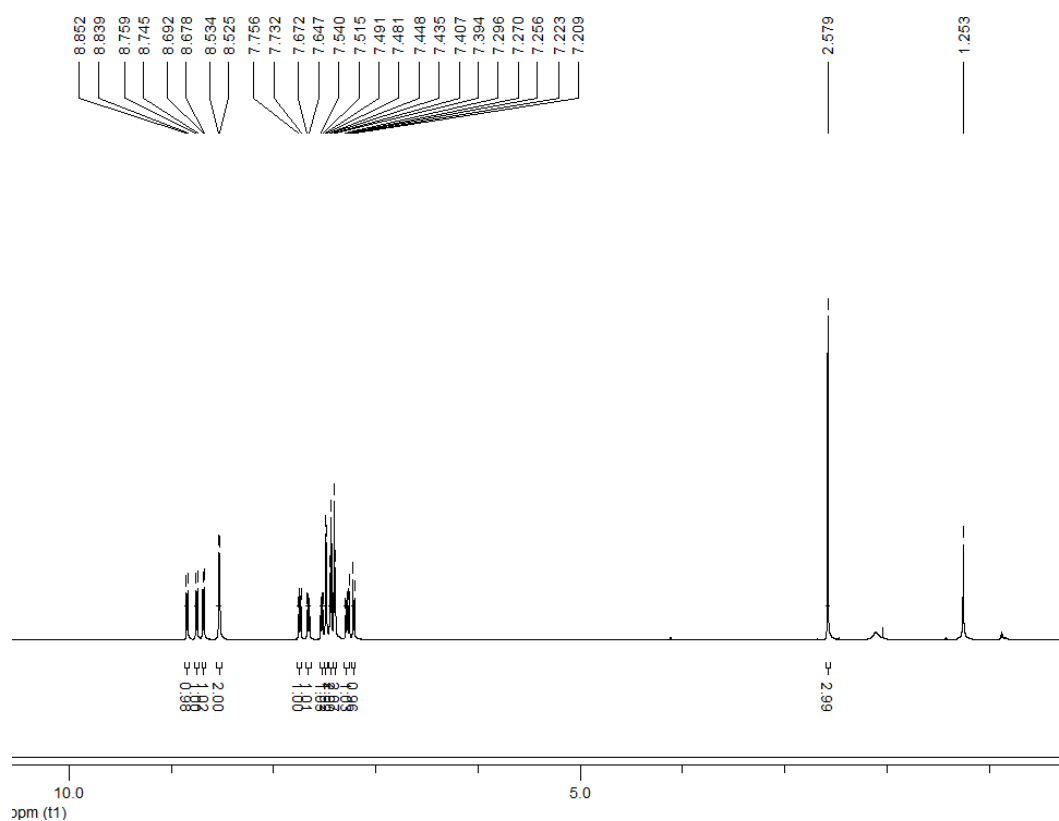

**Fig. S1**  $^1\text{H}$  NMR spectrum of PPI in  $\text{CDCl}_3$ .

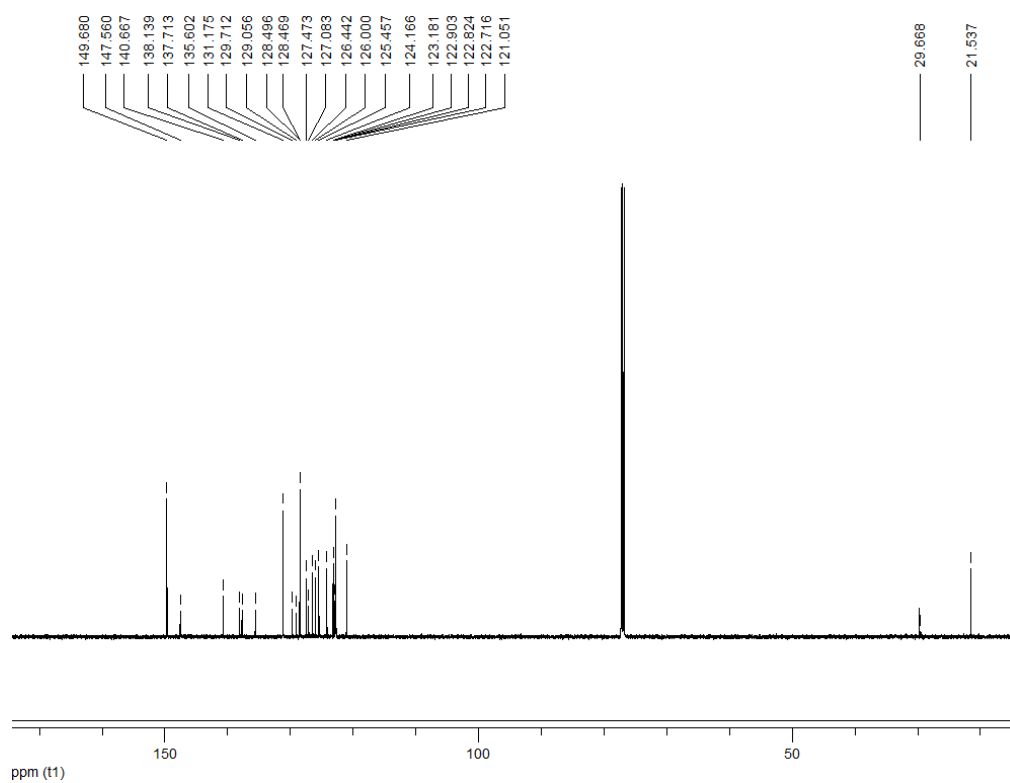

**Fig. S2**  $^{13}\text{C}$  NMR spectrum of **PPI** in  $\text{CDCl}_3$ .

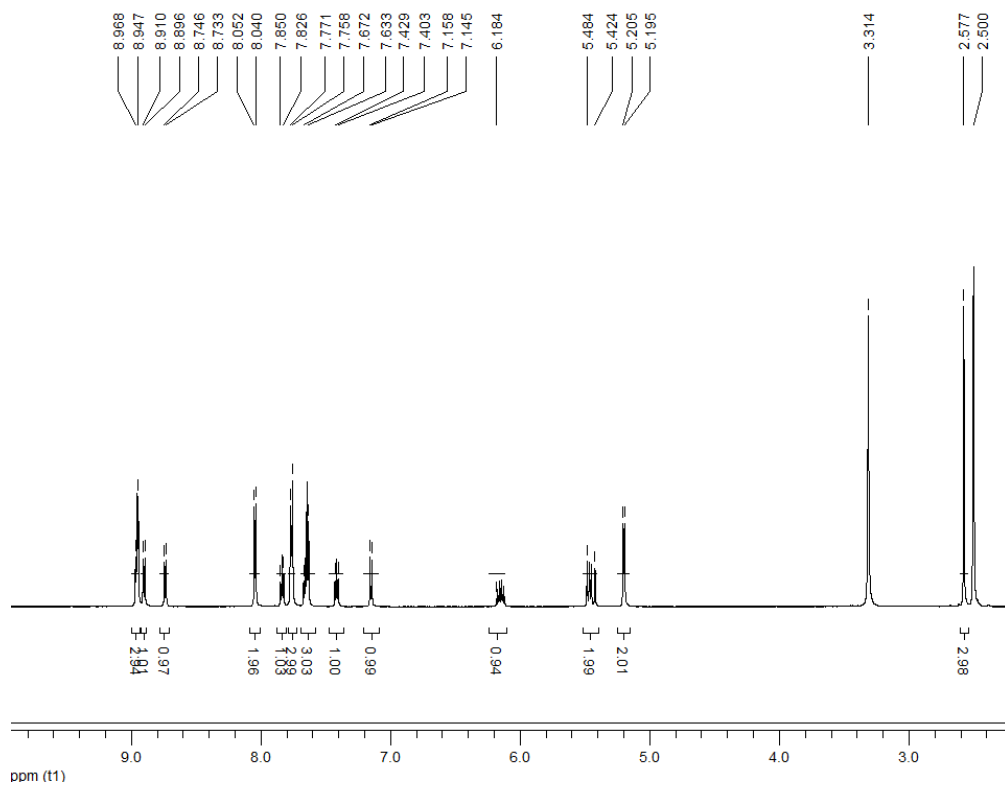

**Fig. S3**  $^1\text{H}$  NMR spectrum of AL-PPI in  $\text{DMSO-}d_6$ .

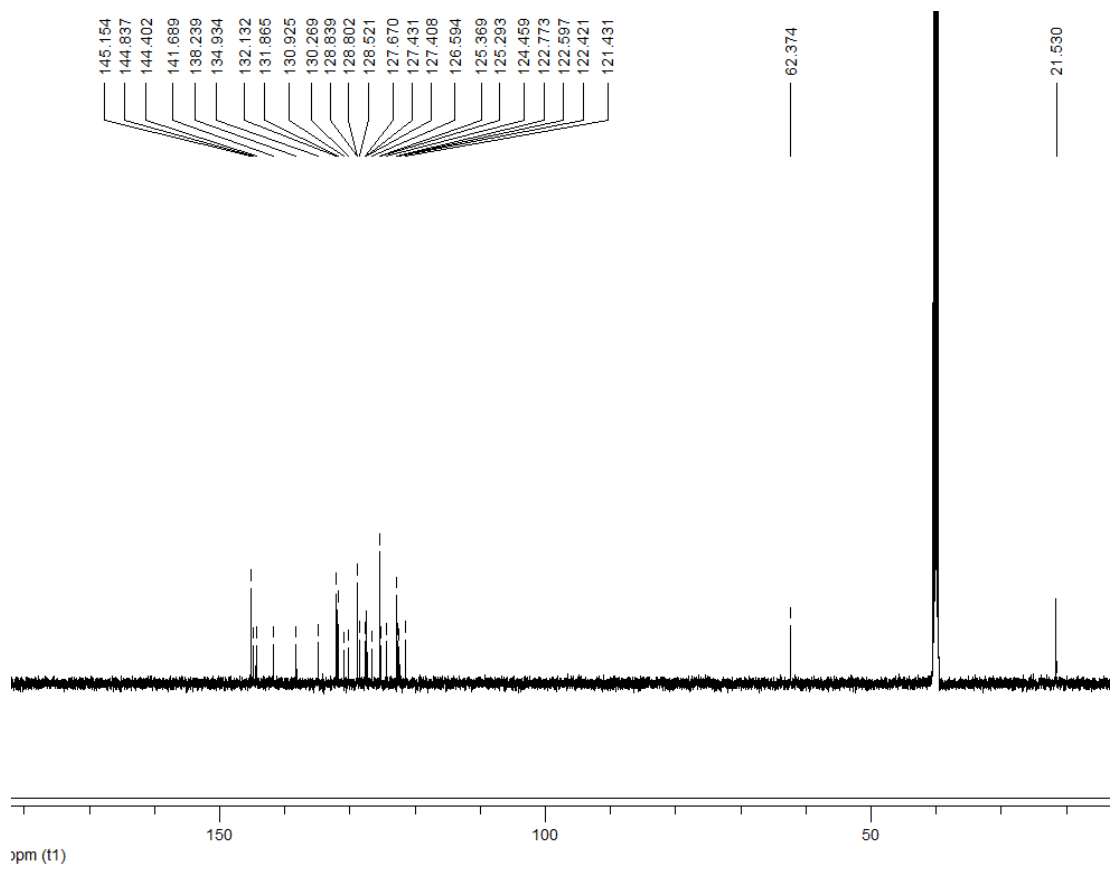

**Fig. S4**  $^{13}\text{C}$  NMR spectrum of AL-PPI in  $\text{DMSO-}d_6$ .

**Analysis Info**

Analysis Name D:\Data\ESI\2019\2019-10\1022\IC-1\_000002.d

Acquisition Date 10/22/2019 2:17:56 PM

Sample Name C-1

Instrument solariX

**Acquisition Parameter**

Acquisition Mode Single MS

Acquired Scans 2

Polarity Positive

Broadband Low Mass 101.1 m/z

Broadband High Mass 600.0 m/z

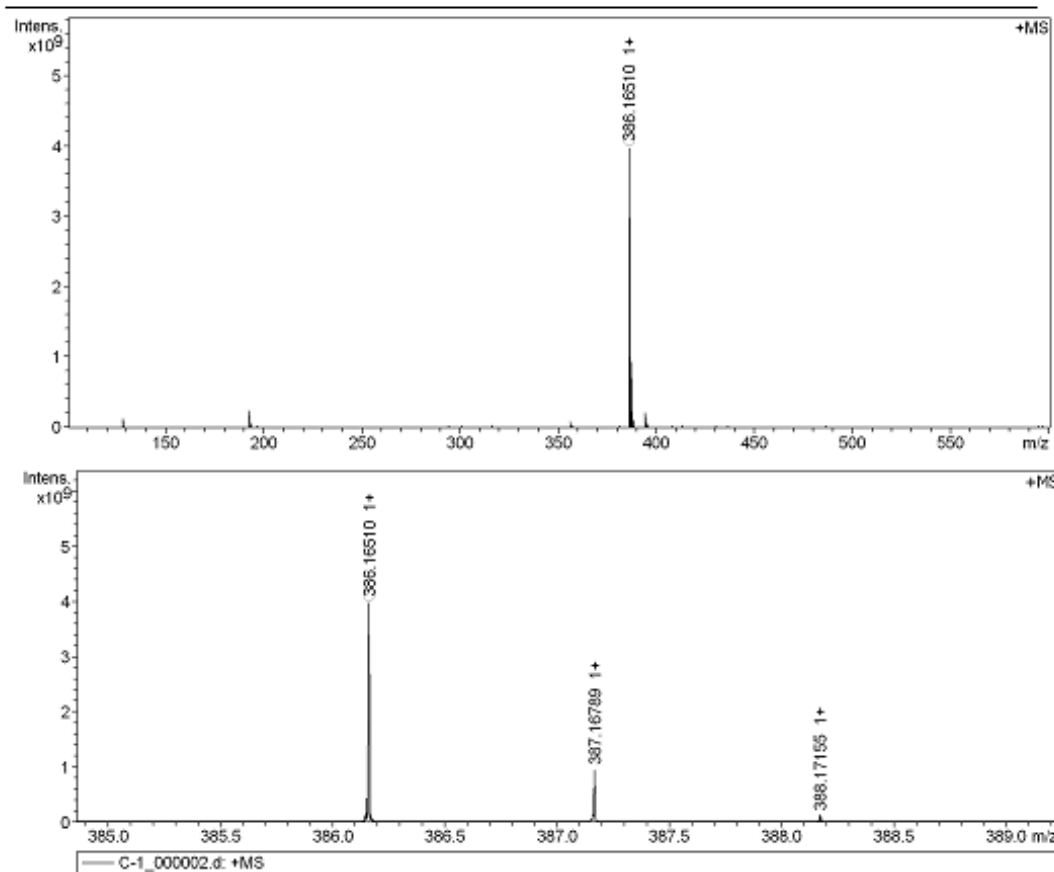

| Meas. m/z  | # | Ion Formula                                    | Score  | m/z        | err [ppm] | Mean err [ppm] | mSigma | rdB  | e <sup>-</sup> Conf | N-Rule |
|------------|---|------------------------------------------------|--------|------------|-----------|----------------|--------|------|---------------------|--------|
| 386.165095 | 1 | C <sub>27</sub> H <sub>20</sub> N <sub>3</sub> | 100.00 | 386.165174 | -0.2      | 0.4            | 35.5   | 19.5 | even                | ok     |

**Fig. S5** ESI-HRMS spectra of **PPI**.

**Analysis Info**  
Analysis Name D:\Data\ESI\2019\2019-10\1022\C-2\_000004.d Acquisition Date 10/22/2019 2:25:15 PM  
Sample Name C-2 Instrument solarX

**Acquisition Parameter**  
Acquisition Mode Single MS Acquired Scans 2  
Polarity Positive  
Broadband Low Mass 101.1 m/z Broadband High Mass 700.0 m/z

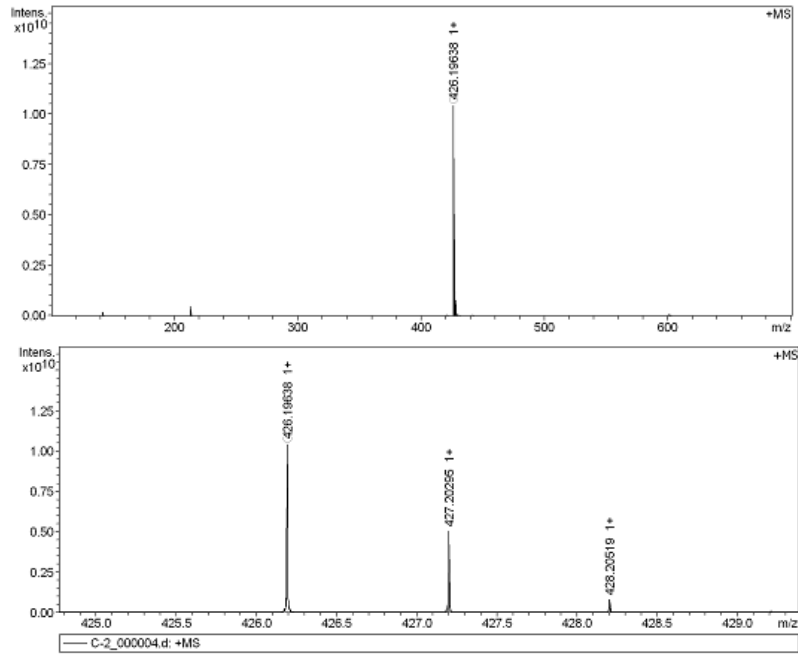

| Meas. m/z  | # | Ion Formula                                    | Score  | m/z        | err [ppm] | Mean err [ppm] | mSigma | rdb  | e <sup>-</sup> Conf | N-Rule |
|------------|---|------------------------------------------------|--------|------------|-----------|----------------|--------|------|---------------------|--------|
| 426.196378 | 1 | C <sub>30</sub> H <sub>24</sub> N <sub>3</sub> | 100.00 | 426.196474 | -0.2      | -0.2           | 169.5  | 20.5 | even                | ok     |

**Fig. S6** ESI-HRMS spectra of AL-PPI.

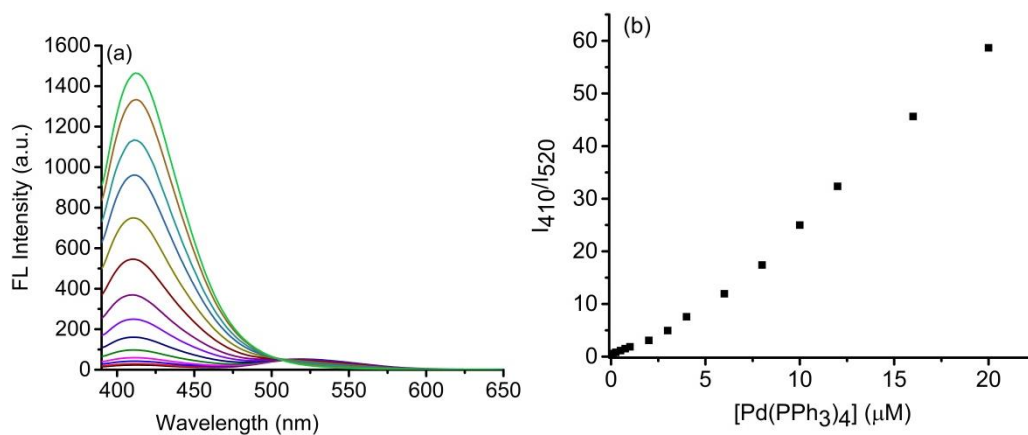

**Fig. S7** (a) Fluorescence spectra of **AL-PPI** (10  $\mu\text{M}$ ) in the presence of different concentrations of  $\text{Pd}(\text{PPh}_3)_4$  in ethanol. (b) Fluorescence intensity ratio ( $I_{410}/I_{520}$ ) as a function of  $\text{Pd}^0$  concentration.

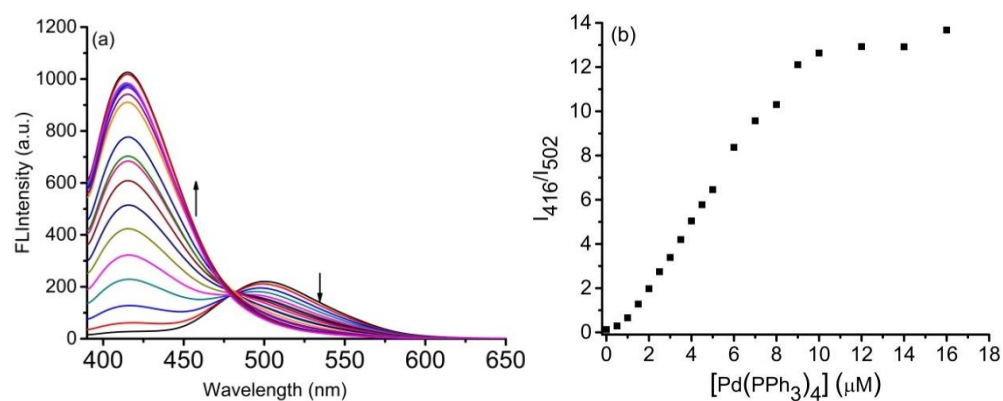

**Fig. S8** (a) Fluorescence spectra of **AL-PPI** (10  $\mu\text{M}$ ) upon addition of  $\text{Pd}(\text{PPh}_3)_4$  in CTAC (2 mM) aqueous solution ( $\lambda_{\text{ex}} = 375 \text{ nm}$ ). (b) The fluorescence intensity ratio ( $I_{416}/I_{502}$ ) versus concentration of  $\text{Pd}(\text{PPh}_3)_4$ .

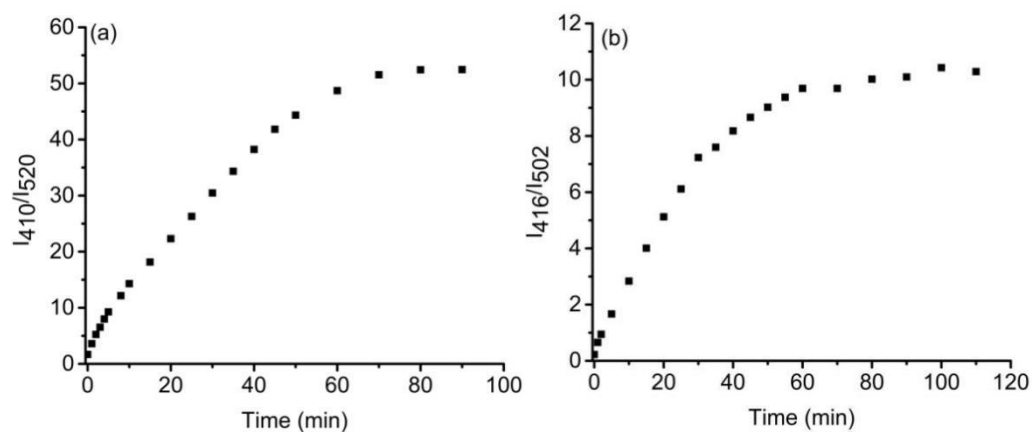

**Fig. S9** Time course of emission intensity ratio of **AL-PPI** (10  $\mu\text{M}$ ) after addition of  $\text{Pd}(\text{PPh}_3)_4$  (10  $\mu\text{M}$ ) in (a) ethanol and (b) in PBS (10 mM, pH 7.4) containing CTAC (2 mM).

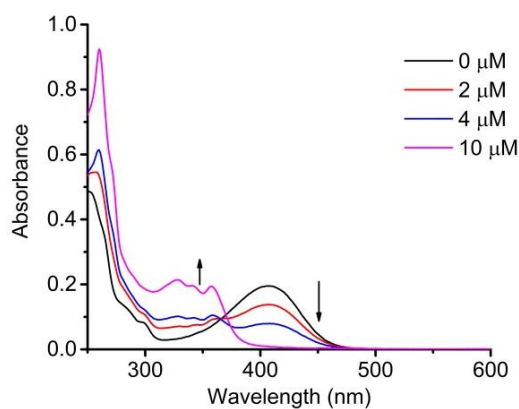

**Fig. S10** The changes of absorption spectra of **AL-PPI** (10  $\mu\text{M}$ ) upon addition of  $\text{Pd}(\text{PPh}_3)_4$  in CTAC aqueous solution.

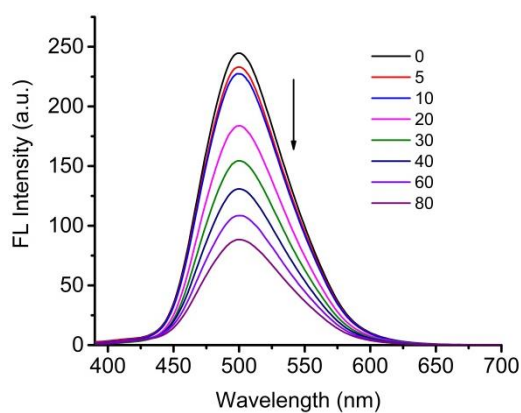

**Fig. S11** Fluorescence spectral changes of **AL-PPI** (10  $\mu\text{M}$ ) upon addition of  $\text{Pd}^{2+}$  (0-80  $\mu\text{M}$ ) in CTAC aqueous solution ( $\lambda_{\text{ex}} = 375 \text{ nm}$ ).



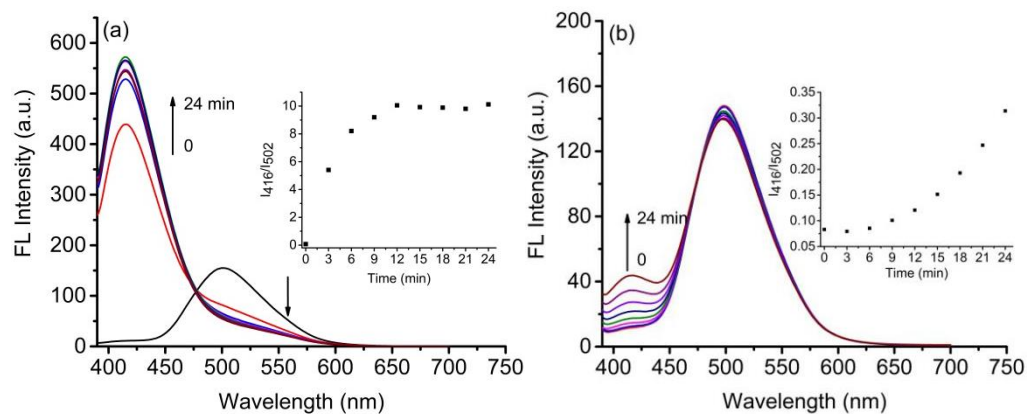

**Fig. S12** (a) Fluorescence spectra of **AL-PPI** (10  $\mu\text{M}$ ) in the presence of (a) TFP (75  $\mu\text{M}$ ) and (b)  $\text{PPh}_3$  (75  $\mu\text{M}$ ) in PBS buffer (10 mM, pH 7.4) containing  $\text{Pd}^{2+}$  (10  $\mu\text{M}$ ) and CTAC (2 mM). Inset: time-dependent fluorescence response of **AL-PPI** toward  $\text{Pd}^{2+}$  in the presence of phosphine ligand.

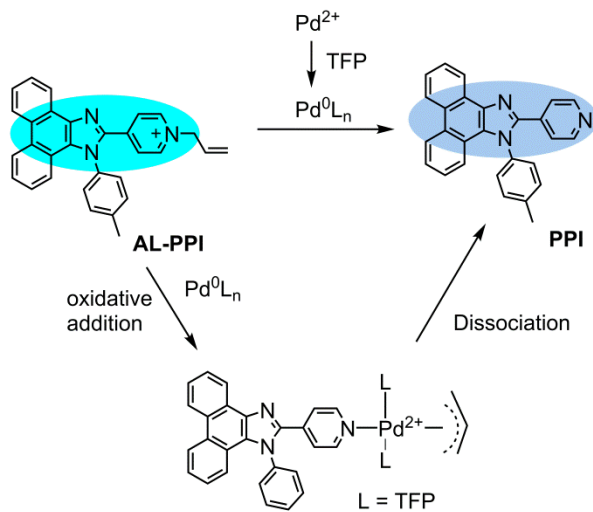

**Fig. S13** Mechanism for selective recognition of  $\text{Pd}^{2+}$  by **AL-PPI** with the aid of TFP.

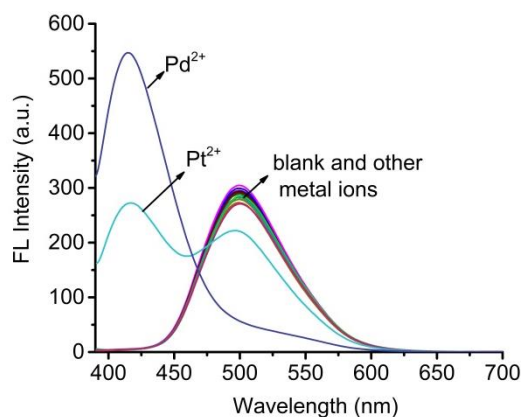

**Fig. S14** Fluorescence spectra of a mixed solution of **AL-PPI** (10  $\mu\text{M}$ ), TFP (75  $\mu\text{M}$ ) upon addition of  $\text{Pd}^{2+}$  (10  $\mu\text{M}$ ) and other metal ions, including  $\text{Mg}^{2+}$ ,  $\text{Ca}^{2+}$ ,  $\text{Hg}^{2+}$ ,  $\text{Fe}^{2+}$ ,  $\text{Fe}^{3+}$ ,  $\text{Ni}^{2+}$ ,  $\text{Cu}^{2+}$ ,  $\text{Zn}^{2+}$ ,  $\text{Ag}^+$ ,  $\text{Sn}^{2+}$ ,  $\text{Al}^{3+}$ ,  $\text{Cd}^{2+}$ ,  $\text{Co}^{2+}$ ,  $\text{Cr}^{3+}$ ,  $\text{Pb}^{2+}$  and  $\text{Pt}^{2+}$  (20  $\mu\text{M}$ , respectively) ( $\lambda_{\text{ex}} = 375 \text{ nm}$ ). All spectra were recorded at 15 min after mixing of **AL-PPI** and analyte in PBS (10 mM, pH 7.4) containing CTAC (2 mM) ( $\lambda_{\text{ex}} = 375 \text{ nm}$ ).

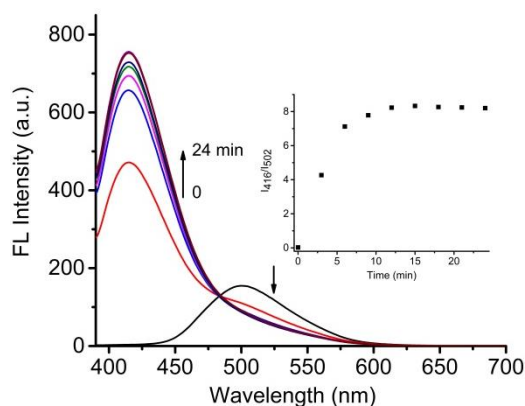

**Fig. S15** Fluorescence emission spectra of **AL-PPI** (10  $\mu\text{M}$ ) upon addition of in NaOAc-HOAc buffer solution (10 mM, pH = 5.0) containing CTAC (2 mM). Inset: time-dependent fluorescence change of **AL-PPI** (10  $\mu\text{M}$ ) in the presence of TFP (75  $\mu\text{M}$ ) and  $\text{Pd}^{2+}$  (10  $\mu\text{M}$ ).

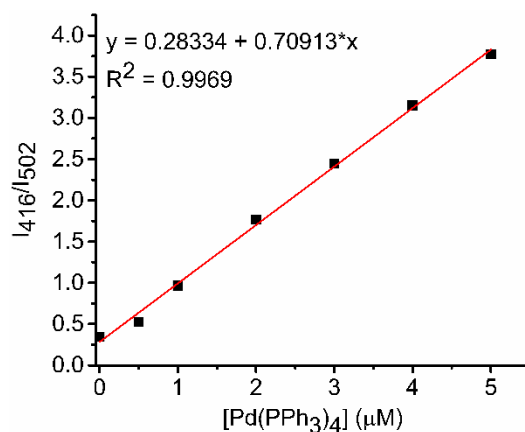

**Fig. S16** The linear relationship of the  $I_{416}/I_{502}$  as a function of the concentration of  $\text{Pd}(\text{PPh}_3)_4$  (0-5  $\mu\text{M}$ ) in the Qizhen Lake water containing **AL-PPI** (10  $\mu\text{M}$ ) and CTAC (2 mM).

**Table S1** Analysis results of  $\text{Pd}^0$  in real water samples ( $n = 4$ )<sup>a,b</sup>

| AL-PPI | Added ( $\mu\text{M}$ ) | Found ( $\mu\text{M}$ ) | RSD (%) | Recovery (%) |
|--------|-------------------------|-------------------------|---------|--------------|
| 1      | 0.5                     | 0.453                   | 0.25    | 90.6         |
| 2      | 1.0                     | 1.257                   | 2.67    | 125.7        |
| 3      | 3.0                     | 3.041                   | 5.37    | 101.3        |
| 4      | 5.0                     | 5.399                   | 1.37    | 108.4        |

<sup>a</sup>lake water from Qizhen Lake, Northwestern Polytechnical University. <sup>b</sup> $\text{Pd}(\text{PPh}_3)_4$  is used as source of  $\text{Pd}^0$ .
